# Supplementary material for: Tyrosinase-mediated synthesis of larvicidal active 1,5-diphenyl pent-4-en-1-one derivatives against Culex quinquefasciatus and investigation of their ichthyotoxicity
Source: PubMed Central journal article supplement (PMC8528871; doi:10.1038/s41598-021-98281-5), 2021-10-20

# Tyrosinase-mediated synthesis of larvicidal active 1,5-diphenyl pent-4-en-1-one derivatives against *Culex quinquefasciatus* and investigation of their ichthyotoxicity

Chidambaram SathishKumar<sup>1</sup>, Daoud ali<sup>2</sup>, Saud alarifi<sup>2</sup>, Radhakrishnan SurendraKumar<sup>1</sup>, and Akbar Idhayadhulla<sup>1\*</sup>

<sup>1</sup> Research Department of Chemistry, Nehru Memorial College (Affiliated to Bharathidasan University), Puthanampatti -621007, Tiruchirappalli District, Tamil Nadu, India.

<sup>2</sup> Department of Zoology, College of Sciences, King Saud University (KSU), Riyadh, Saudi Arabia.

\* Correspondence: [a.idhayadhulla@gmail.com](mailto:a.idhayadhulla@gmail.com), [idhayadhulla@nmc.ac.in](mailto:idhayadhulla@nmc.ac.in)

| S.No | Contents                                                                                                              | Page no. |
|------|-----------------------------------------------------------------------------------------------------------------------|----------|
| 1    | <sup>1</sup> H , and <sup>13</sup> C NMR spectrum of Compound ( <b>1a-1q</b> )                                        | 1 - 17   |
| 2    | <b>Table S1.</b> Molecular docking interaction of compounds ( <b>1a-1q</b> ) and controls <b>Temephos, Permethrin</b> | 18- 24   |

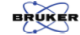

```
Current Data Parameters
NAME      EXT4014
EXPNO     2
PROCNO    1

F1 - Acquisition Parameters
Date_     20250115
Time      12.07
INSTRUM   spect
PROBHD    5 mm PABBO BB/
PULPROG   zgpg30
TD         65536
SOLVENT   DMSO
NS         16
DS         2
SWH        8223.685 Hz
FIDRES     0.12488 Hz
AQ         0.5846387 sec
RG         61.65
AQ         60.800 usec
DE         6.50 usec
TE         298.2 K
D1         1.00000000 sec
D11        0
D12        0
===== CHANNEL f1 =====
NUC1       1H
P1         14.25 usec
PL1        14.00000000 W
SFO1       300.2604710 MHz

F1 - Processing parameters
SI         65536
SF         400.2600000 MHz
WDW        EM
SSB        0
GB         0
PC         0.30 Hz
TI         1.00
```

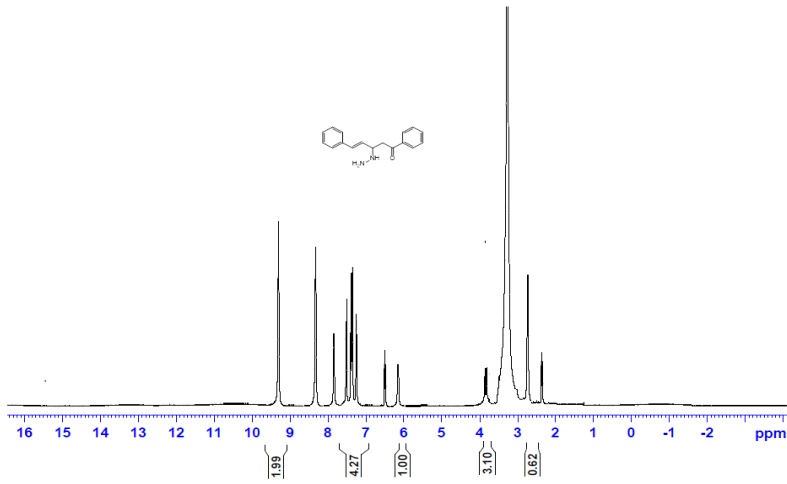

**<sup>1</sup>H NMR of the compound 1a**

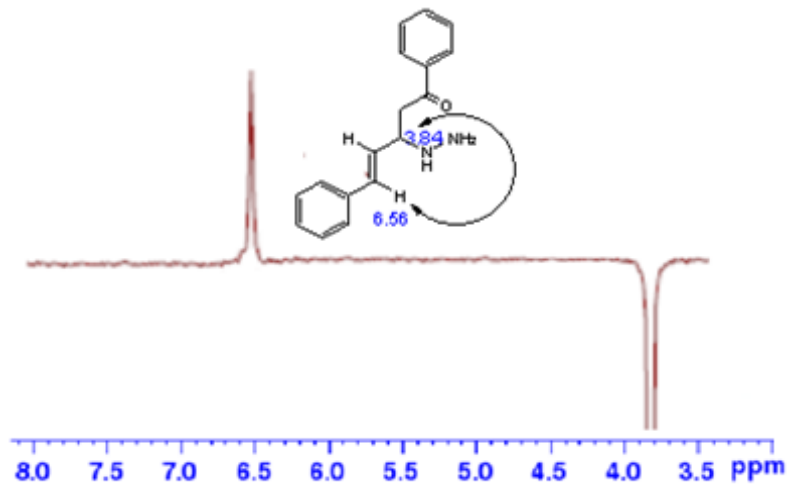

**NOE Data for compound 1a**

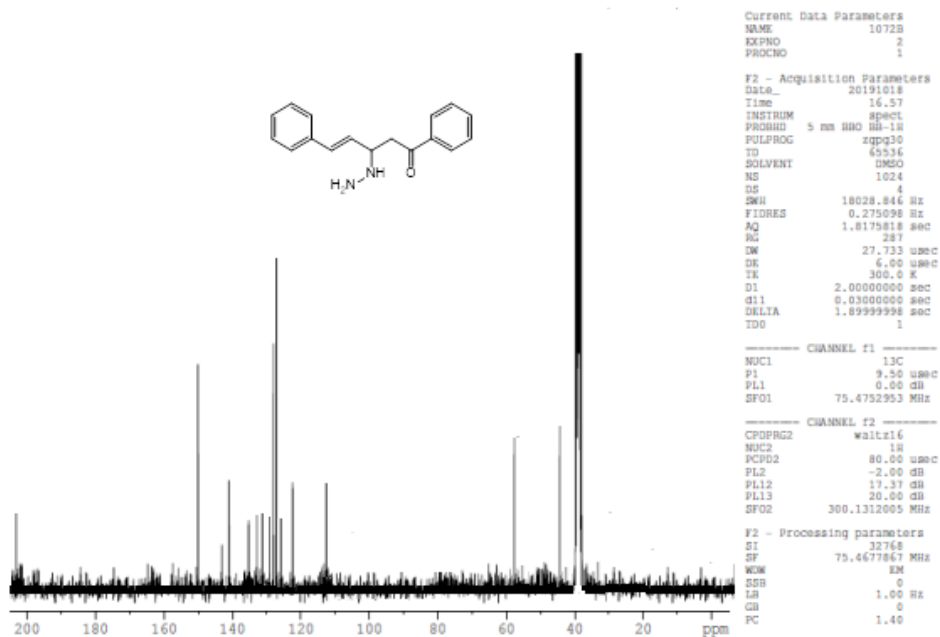

<sup>13</sup>C NMR of the compound 1a

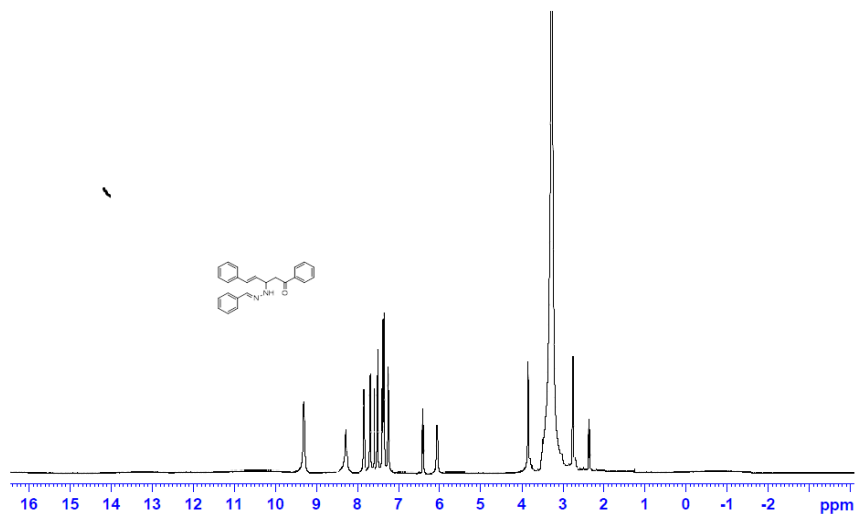

**<sup>1</sup>H NMR of the compound 1b**

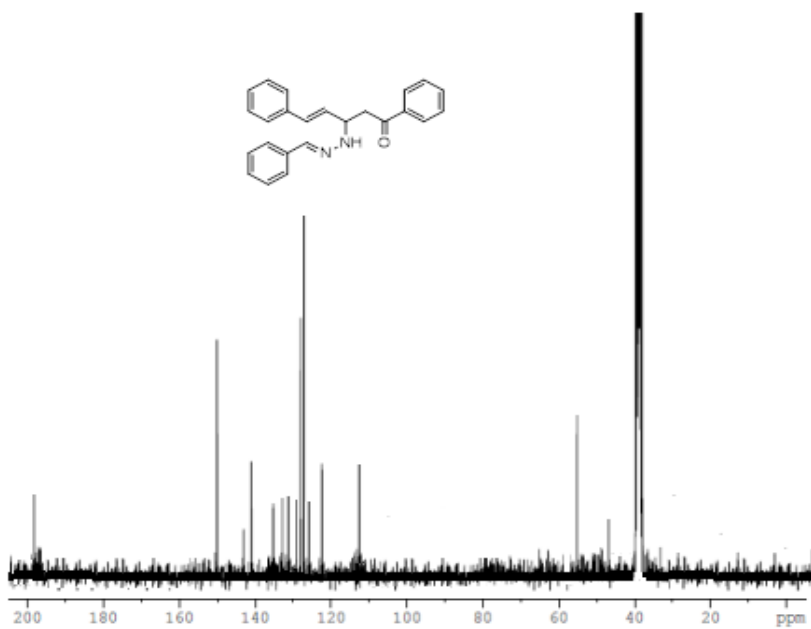

**<sup>13</sup>C NMR of the compound 1b**

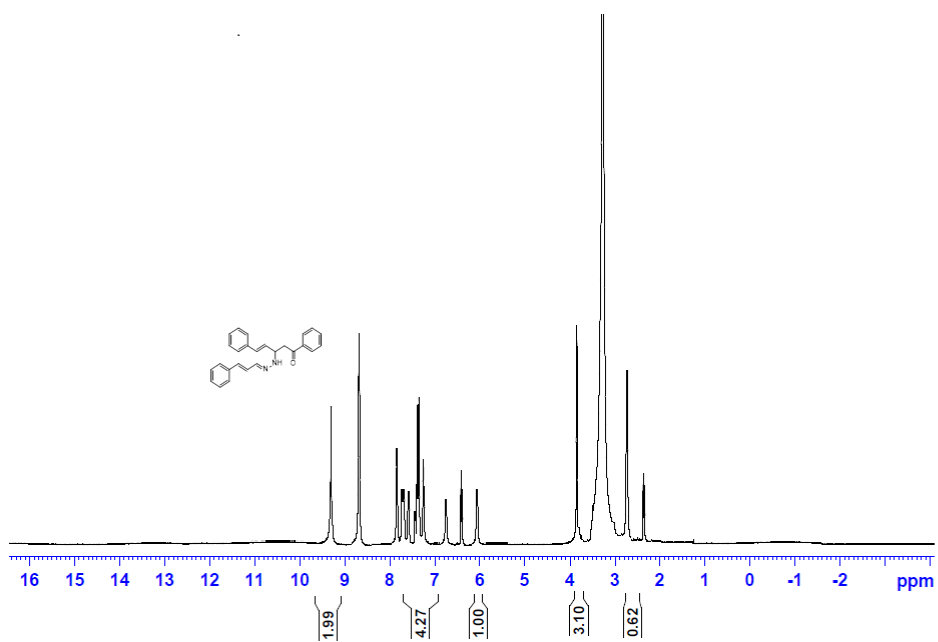

**<sup>1</sup>H NMR of the compound 1c**

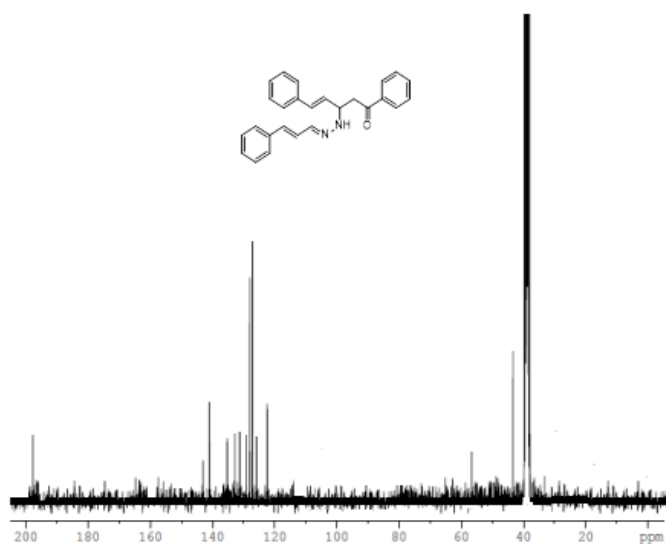

**<sup>13</sup>C NMR of the compound 1c**

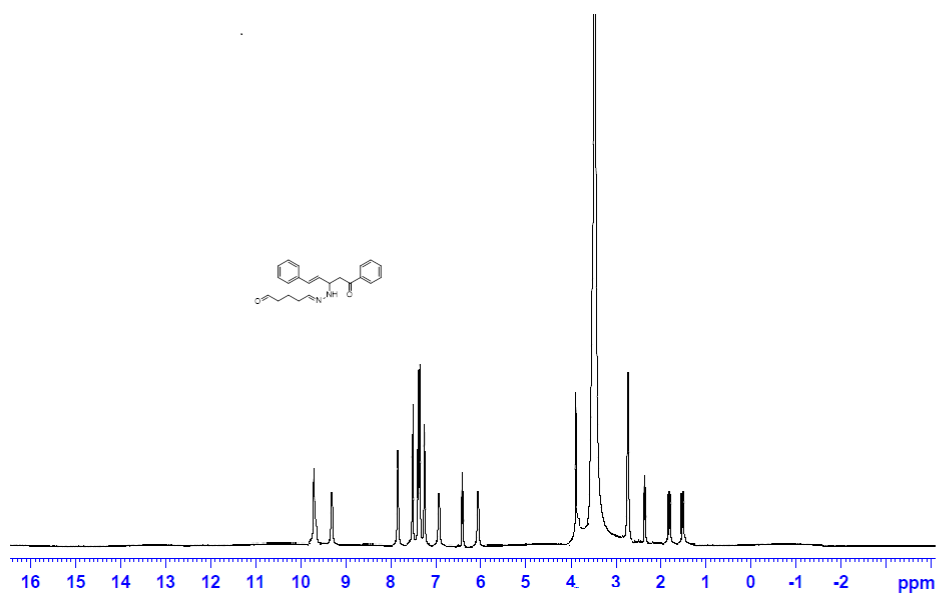

$^1\text{H}$  NMR of the compound 1d

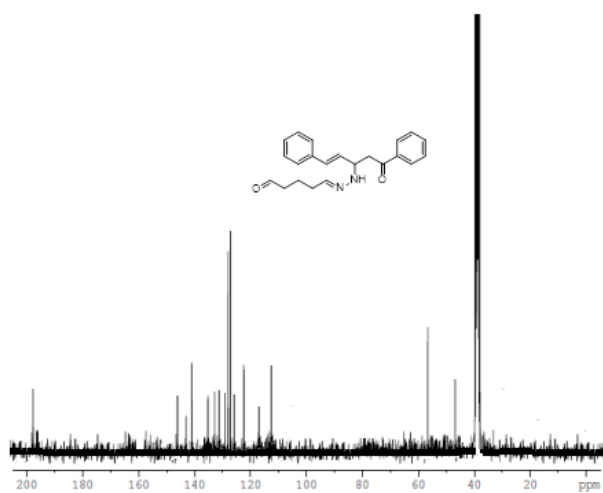

$^{13}\text{C}$  NMR of the compound 1d

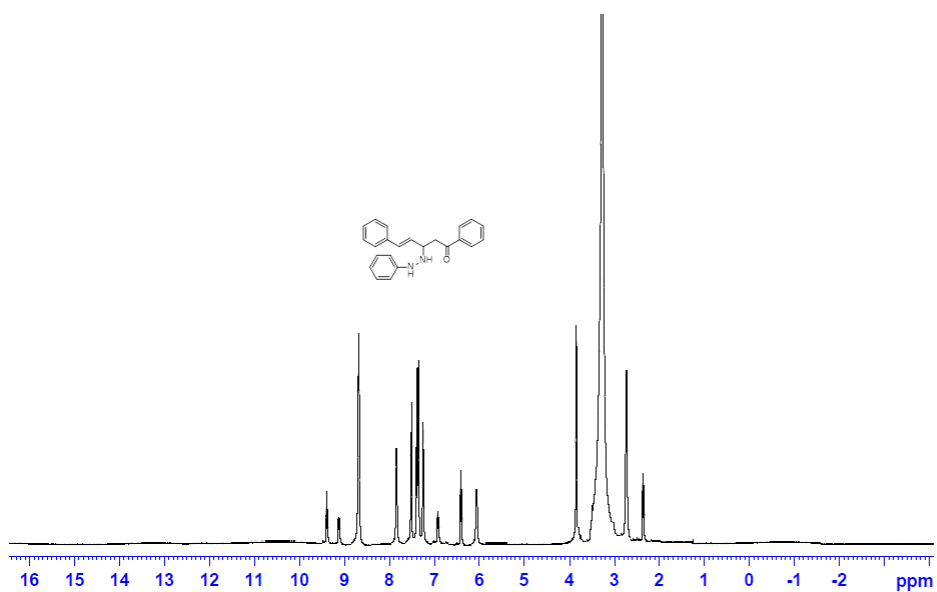

**<sup>1</sup>H NMR of the compound 1e**

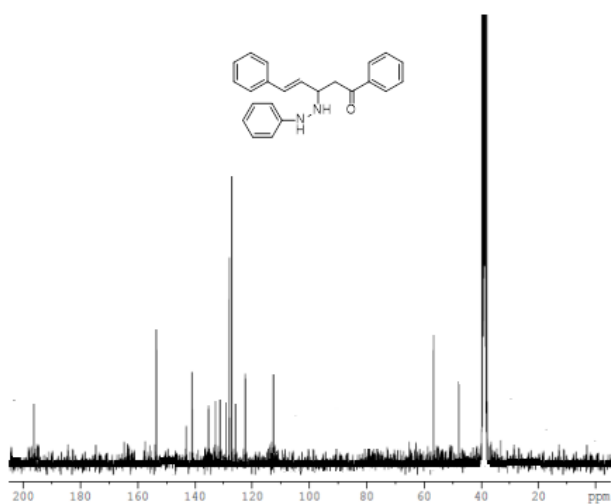

**<sup>13</sup>C NMR of the compound 1e**

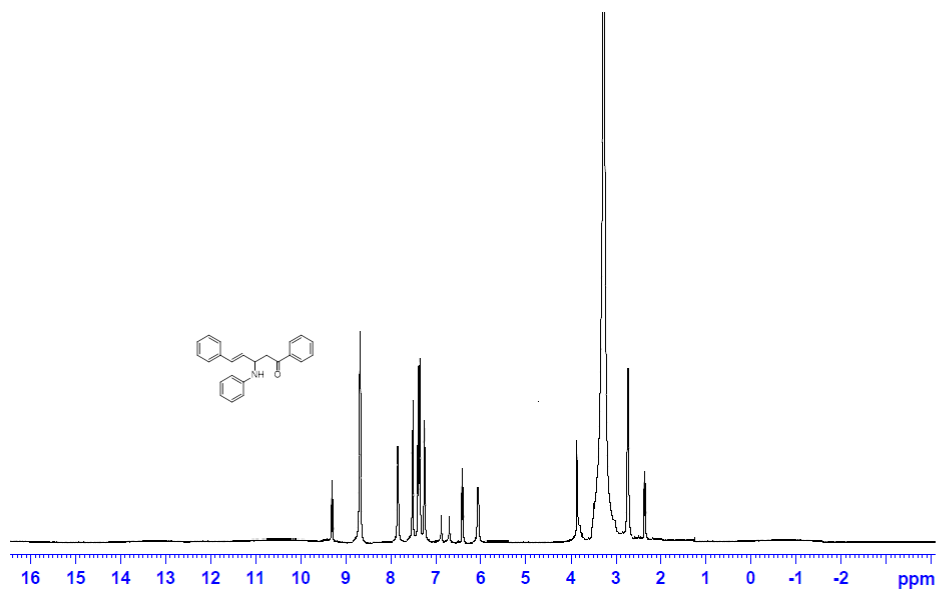

**<sup>1</sup>H NMR of the compound 1f**

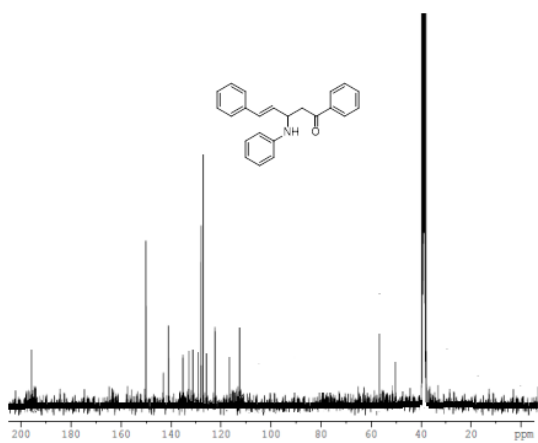

**<sup>13</sup>C NMR of the compound 1f**



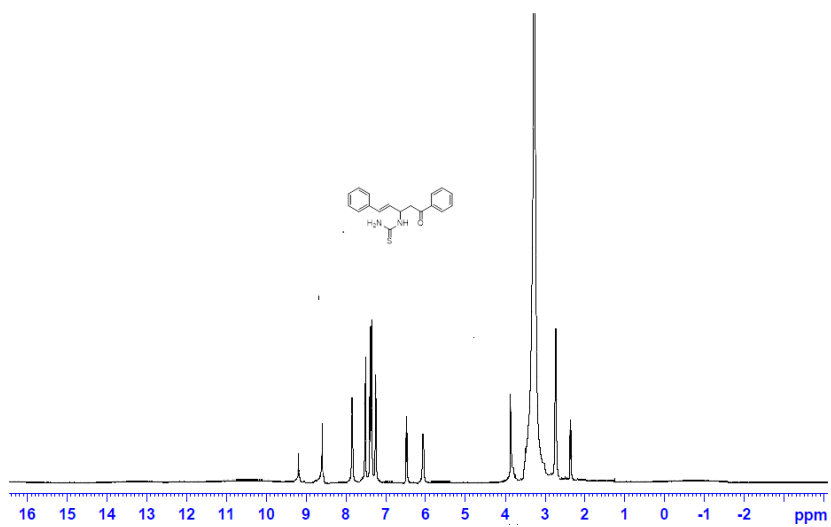

$^1\text{H}$  NMR of the compound 1g

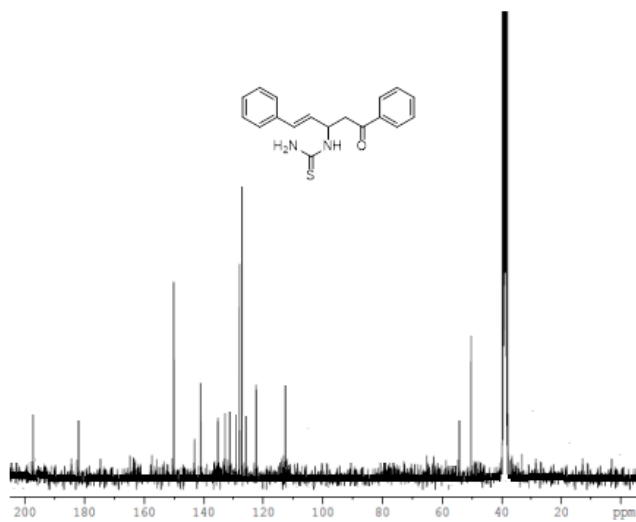

$^{13}\text{C}$  NMR of the compound 1g

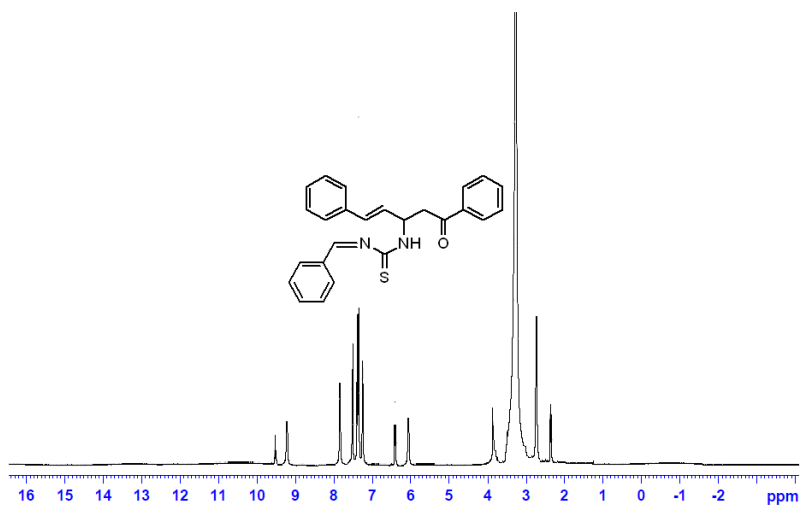

**<sup>1</sup>H NMR of the compound 1h**

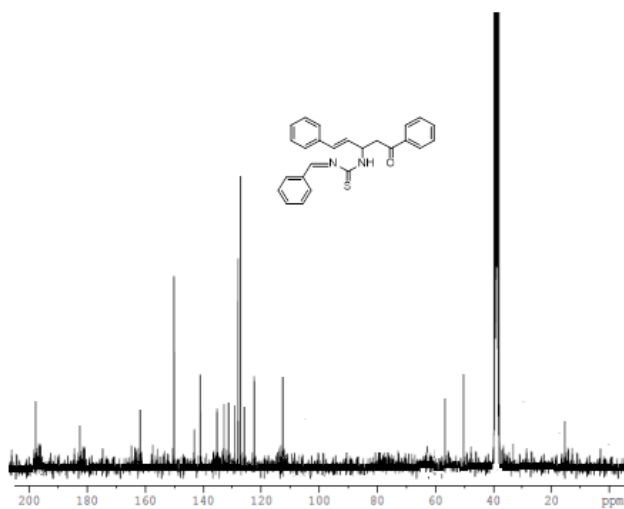

**<sup>13</sup>C NMR of the compound 1h**

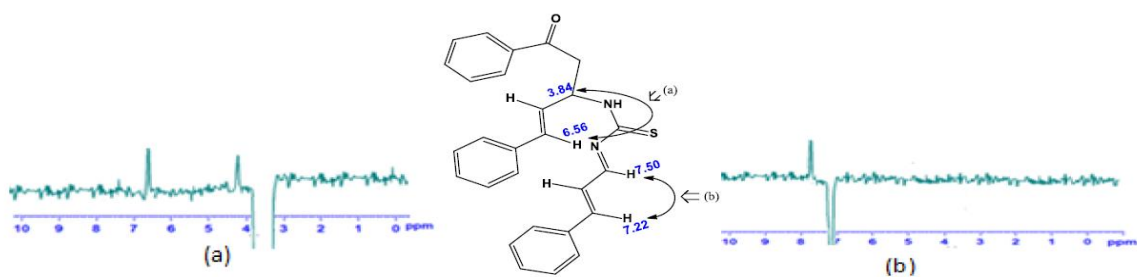

NOE Data for compound 1i

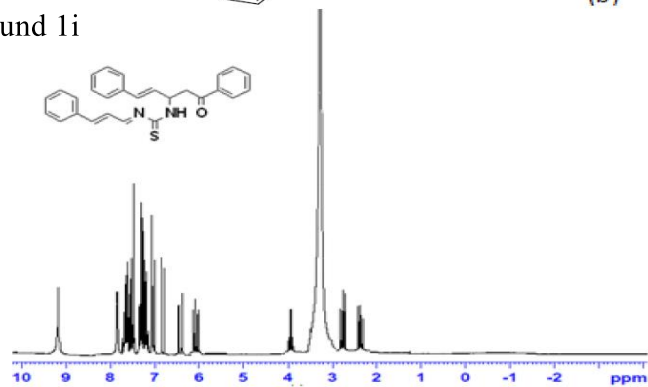

$^1\text{H}$  NMR of the compound 1i

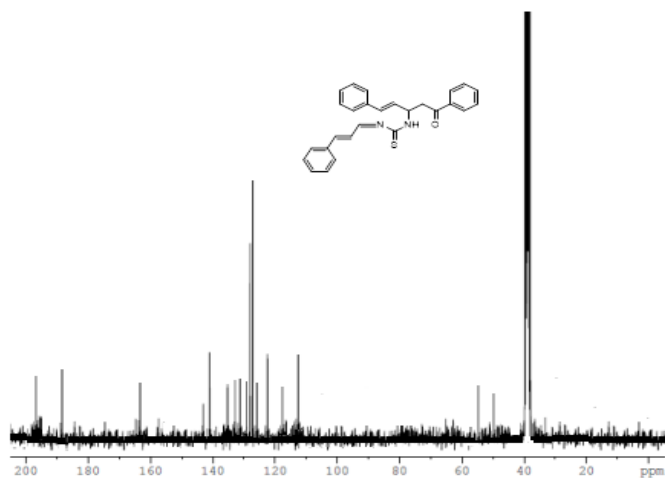

$^{13}\text{C}$  NMR of the compound 1i

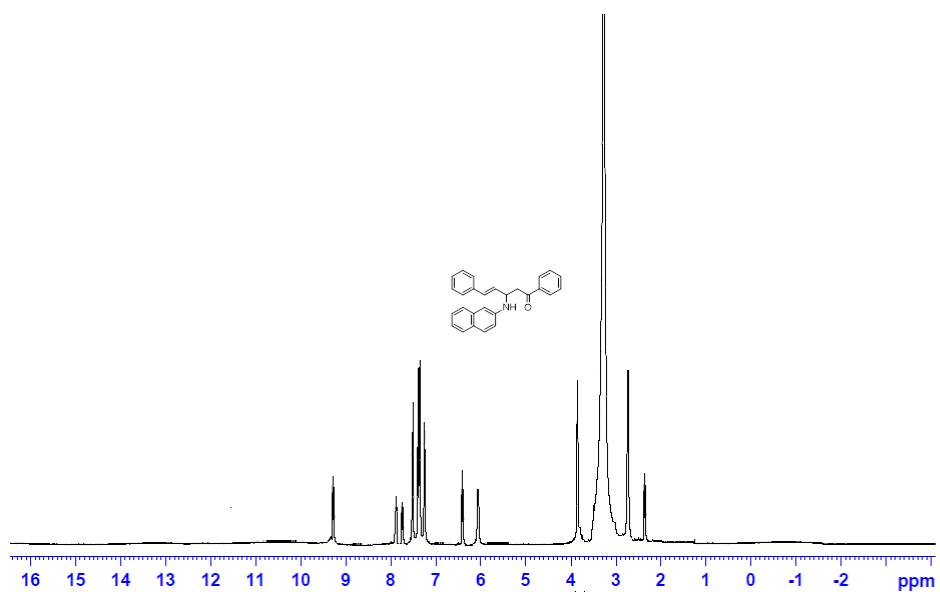

**<sup>1</sup>H NMR of the compound 1j**

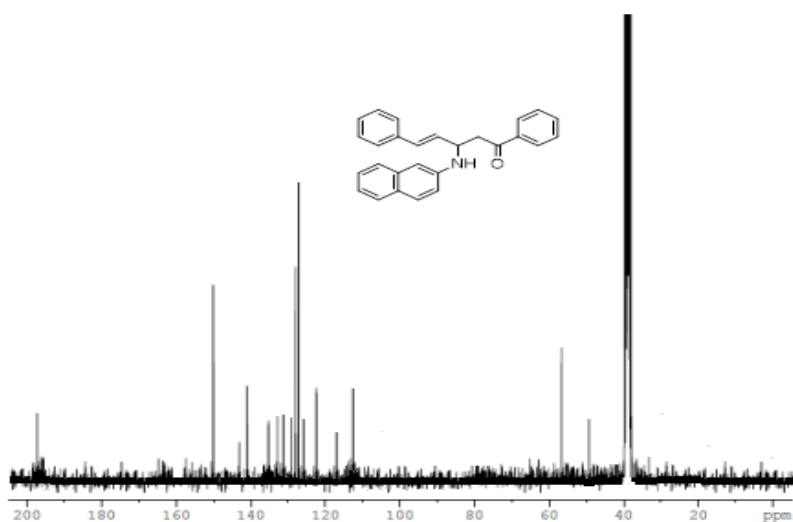

**<sup>13</sup>C NMR of the compound 1j**

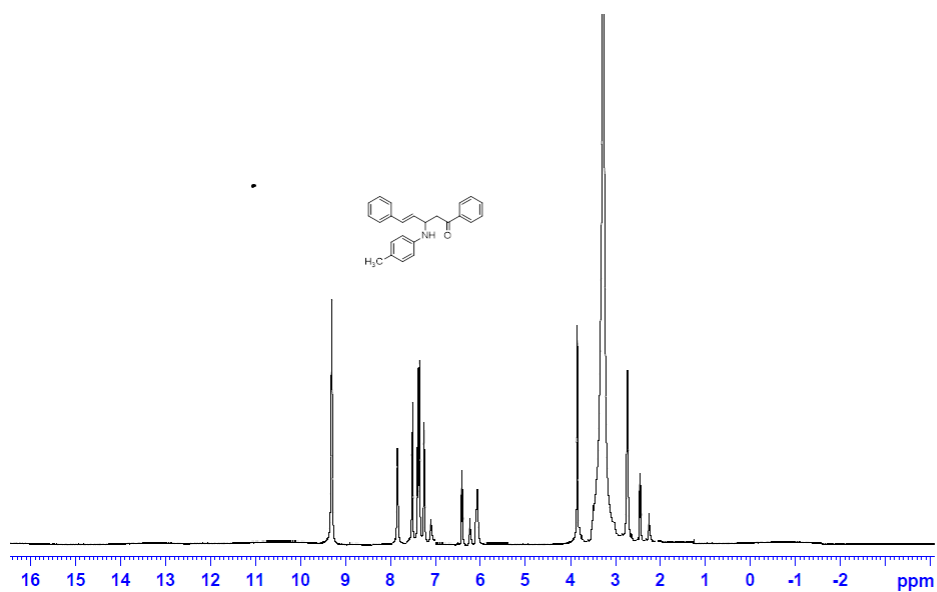

**<sup>1</sup>H NMR of the compound 1k**

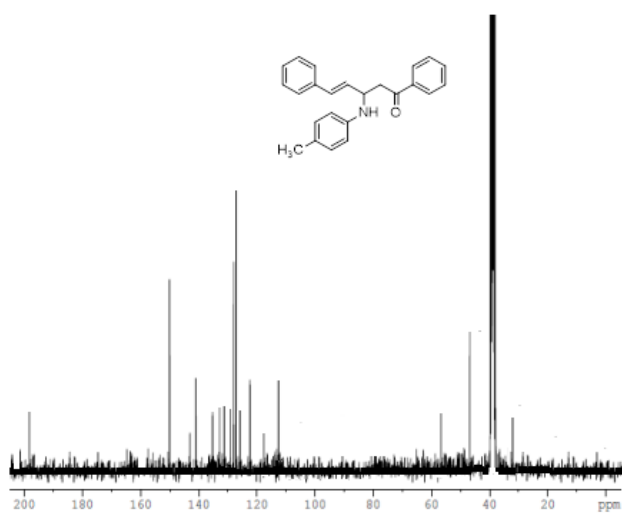

**<sup>13</sup>C NMR of the compound 1k**

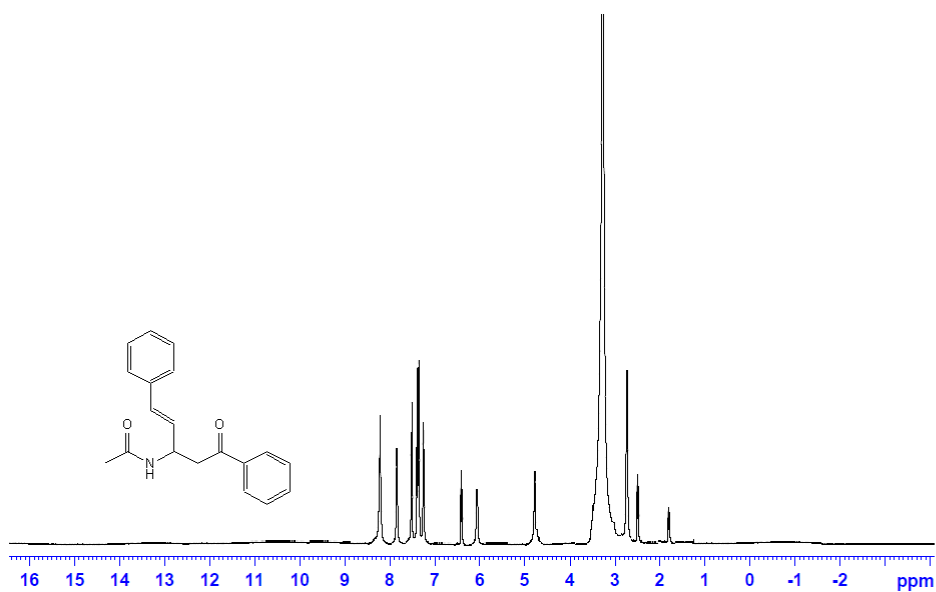

**<sup>1</sup>H NMR of the compound 11**

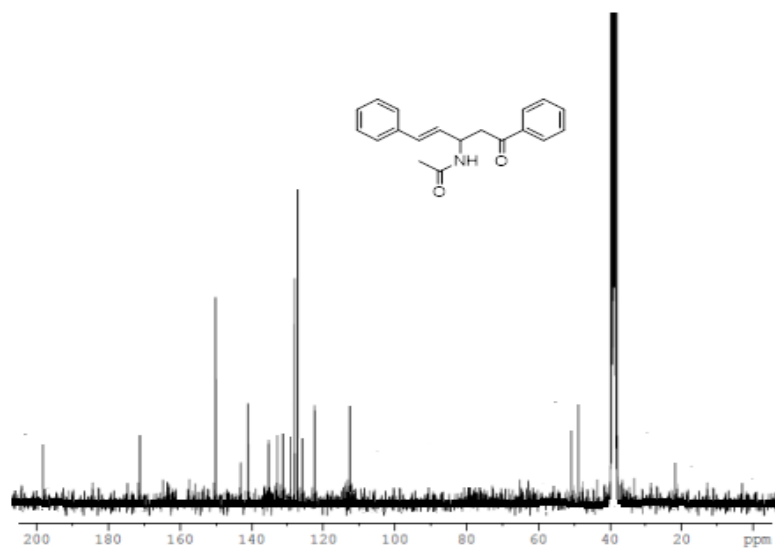

**<sup>13</sup>C NMR of the compound 11**

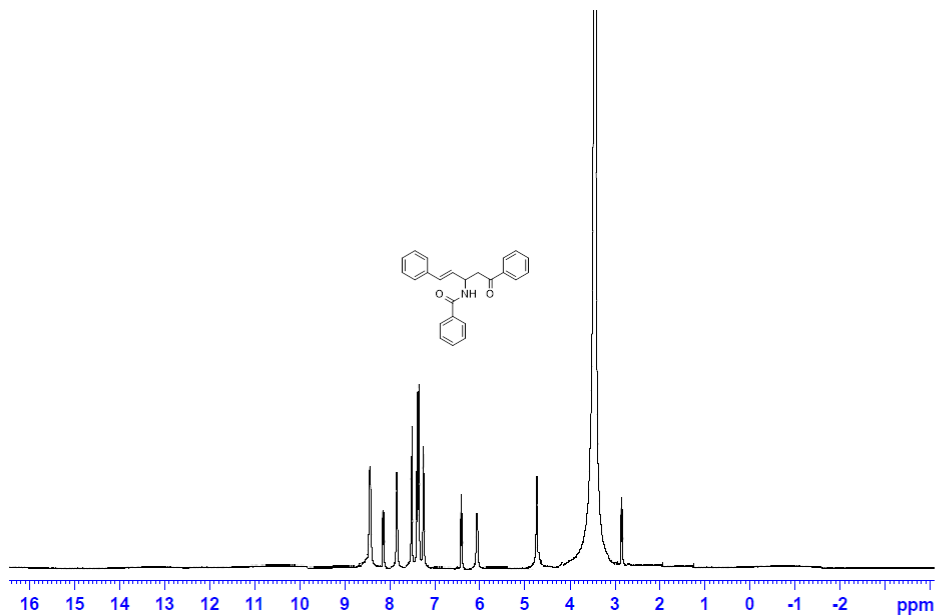

**<sup>1</sup>H NMR of the compound 1m**

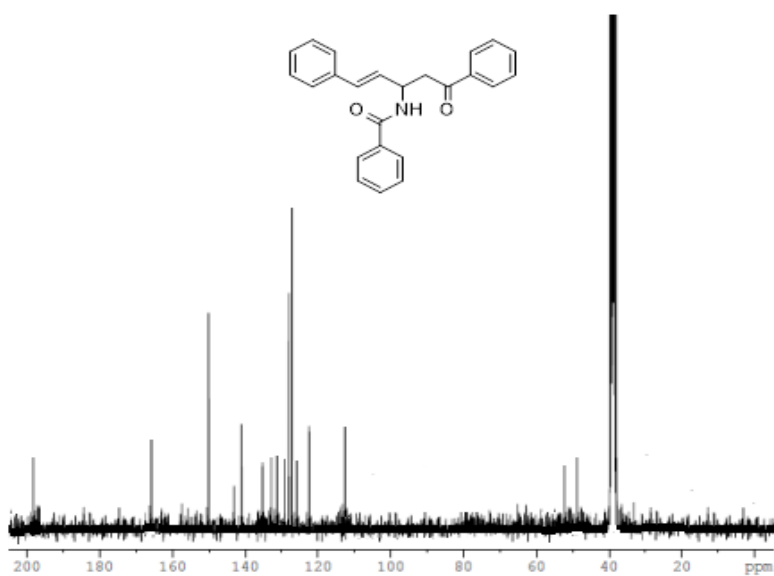

**<sup>13</sup>C NMR of the compound 1m**

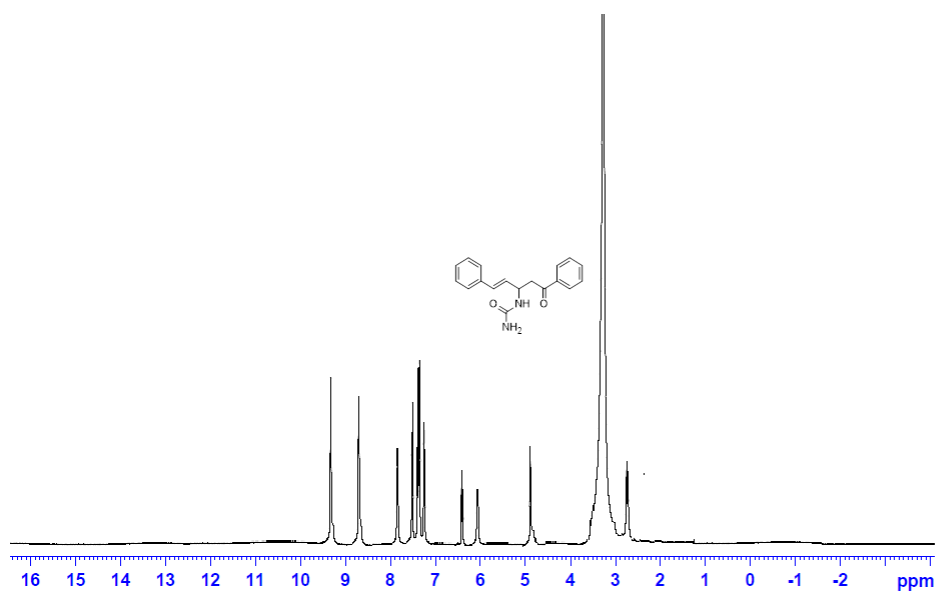

$^1\text{H NMR}$  of the compound n

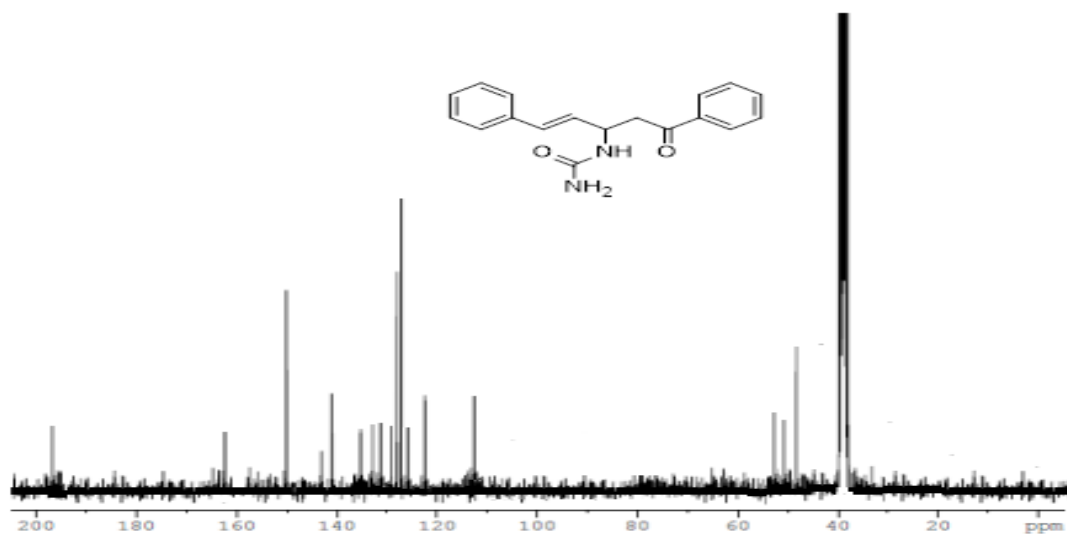

$^{13}\text{C NMR}$  of the compound 1n



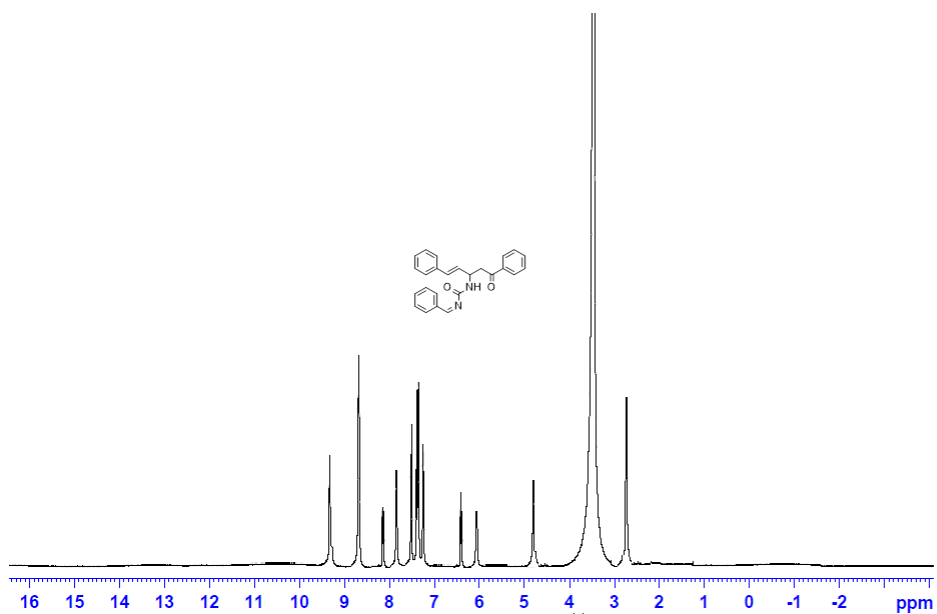

**<sup>1</sup>H NMR of the compound 1o**

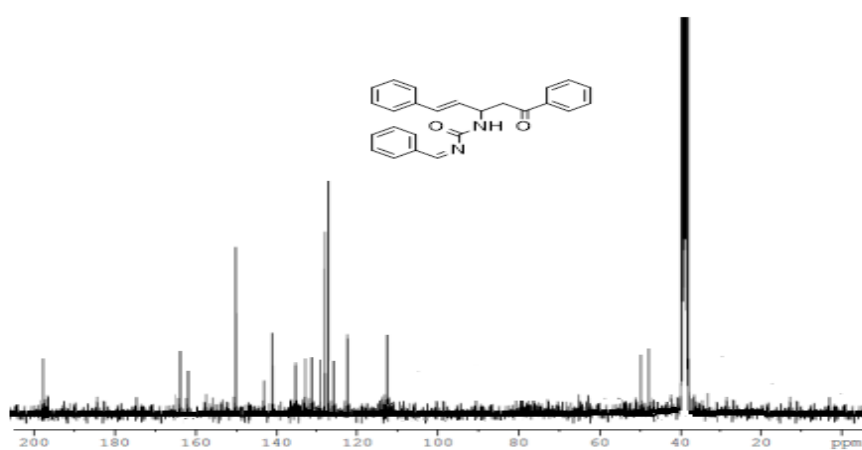

**<sup>13</sup>C NMR of the compound 1o**

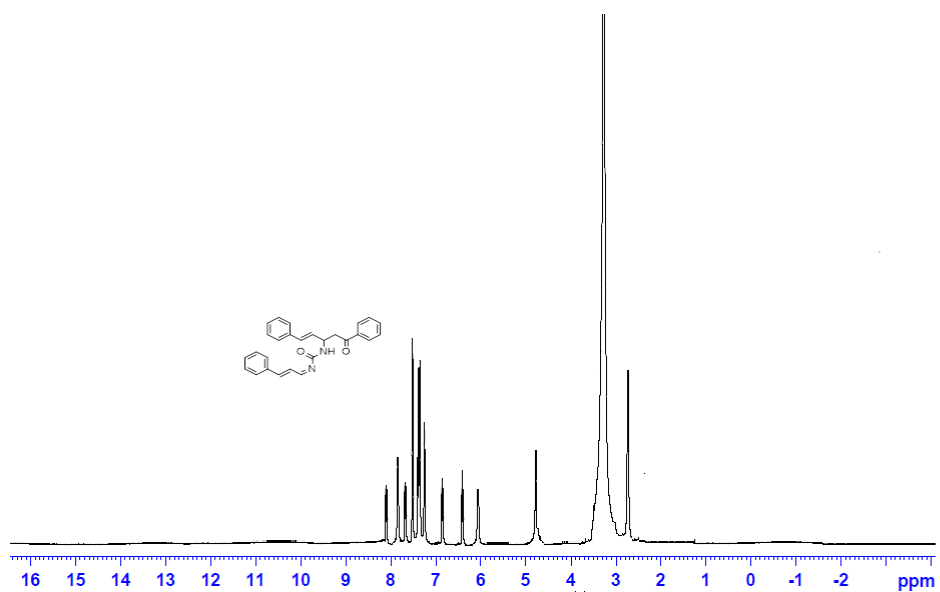

**<sup>1</sup>H NMR of the compound 1p**

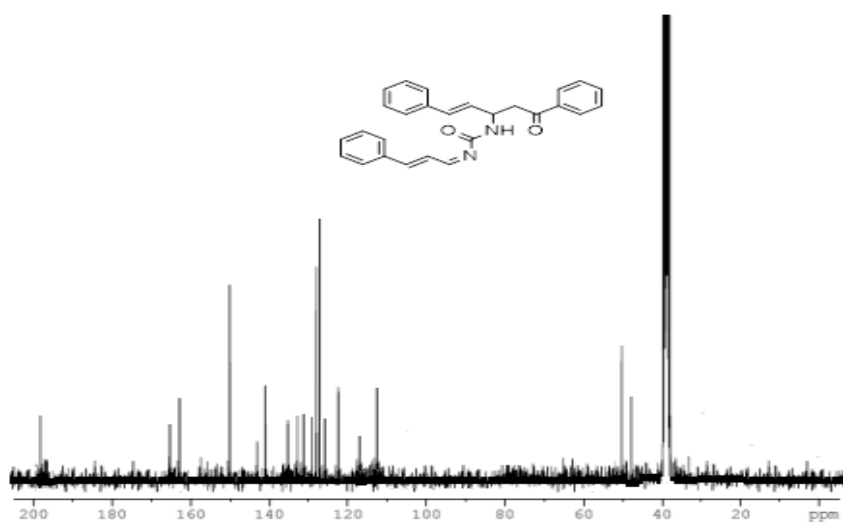

**<sup>13</sup>C NMR of the compound 1p**

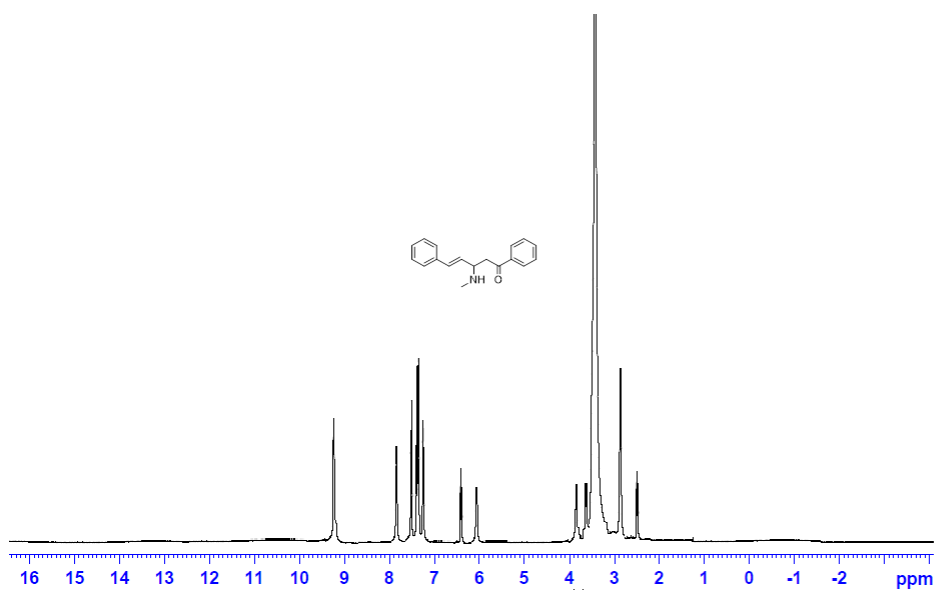

$^1\text{H}$  NMR of the compound 1q

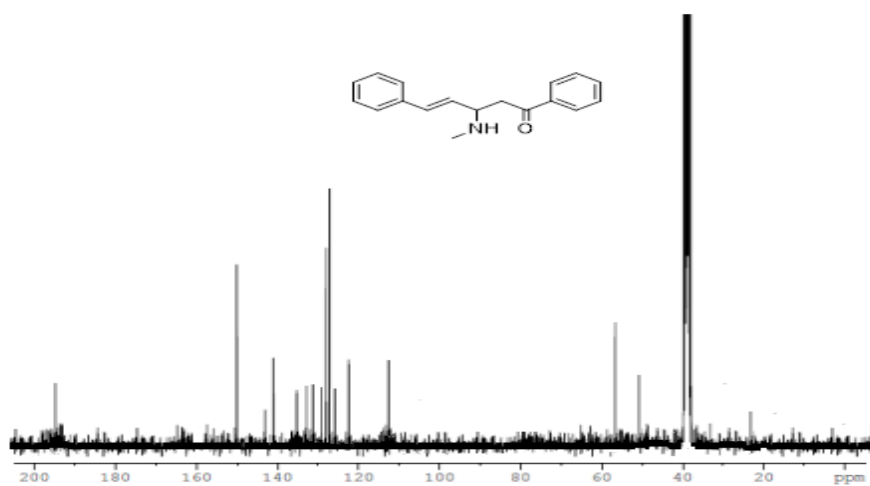

$^{13}\text{C}$  NMR of the compound 1q

**Table S1.** Molecular docking interaction of compounds (**1a-1q**) and controls **Temephos**, **Permethrin**

| Compounds | Mosquito odorant-binding protein 3OGN |                |                    |             |
|-----------|---------------------------------------|----------------|--------------------|-------------|
|           | Binding affinity (kcal/mol)           | No. of H-bonds | H-bonding residues | Interaction |
| <b>1a</b> | -9.0                                  | 2              | His121, Phe123     |             |
| <b>1b</b> | -9.7                                  | 0              | -                  |             |
| <b>1c</b> | -9.0                                  | 0              | -                  |             |

|    |      |   |        |                                                                                                                                                                                                                                                                           |
|----|------|---|--------|---------------------------------------------------------------------------------------------------------------------------------------------------------------------------------------------------------------------------------------------------------------------------|
| 1d | -8.8 | 0 | -      | 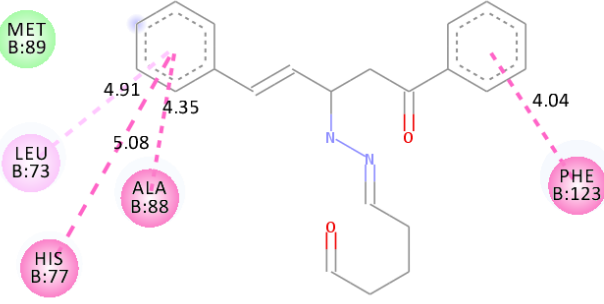 <p><b>Interactions</b></p> <ul style="list-style-type: none"> <li>van der Waals</li> <li>Pi-Pi Stacked</li> <li>Pi-Pi T-shaped</li> <li>Amide-Pi Stacked</li> <li>Pi-Alkyl</li> </ul>  |
| 1e | -9.7 | 1 | Phe123 |  <p><b>Interactions</b></p> <ul style="list-style-type: none"> <li>Conventional Hydrogen Bond</li> <li>Pi-Sigma</li> <li>Pi-Sulfur</li> <li>Pi-Pi Stacked</li> <li>Pi-Alkyl</li> </ul> |
| 1f | -9.6 | 0 | -      |  <p><b>Interactions</b></p> <ul style="list-style-type: none"> <li>Pi-Sigma</li> <li>Pi-Sulfur</li> <li>Pi-Pi Stacked</li> <li>Pi-Alkyl</li> </ul>                                    |

|    |       |   |   |                                                                                                                                                                                                                                                                                             |
|----|-------|---|---|---------------------------------------------------------------------------------------------------------------------------------------------------------------------------------------------------------------------------------------------------------------------------------------------|
| 1g | -8.3  | 0 | - | 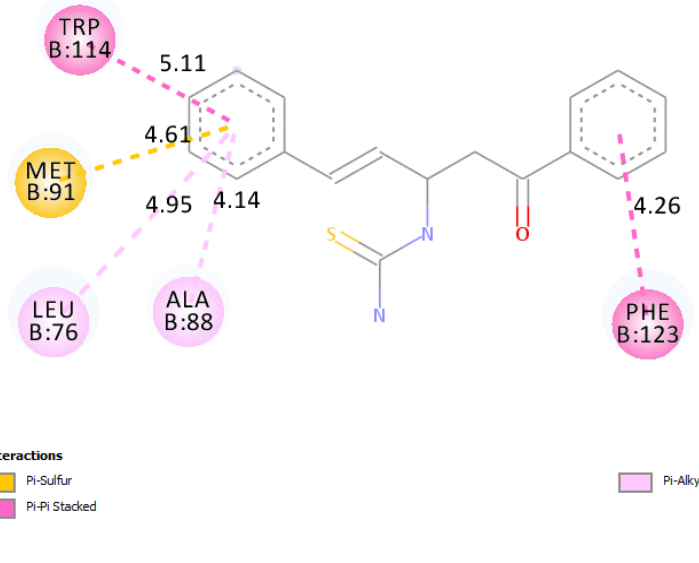 <p><b>Interactions</b></p> <ul style="list-style-type: none"> <li>Pi-Sulfur</li> <li>Pi-Alkyl</li> <li>Pi-Pi Stacked</li> </ul>                                                                          |
| 1h | -9.3  | 0 | - |  <p><b>Interactions</b></p> <ul style="list-style-type: none"> <li>Carbon Hydrogen Bond</li> <li>Pi-Cation</li> <li>Pi-Sigma</li> <li>Pi-Pi Stacked</li> <li>Pi-Pi T-shaped</li> <li>Pi-Alkyl</li> </ul> |
| 1i | -10.0 | 0 | - |  <p><b>Interactions</b></p> <ul style="list-style-type: none"> <li>Pi-Cation</li> <li>Pi-Sigma</li> <li>Pi-Pi T-shaped</li> <li>Alkyl</li> <li>Pi-Alkyl</li> </ul>                                      |

|    |      |   |   |                                                                                                                                                                  |
|----|------|---|---|------------------------------------------------------------------------------------------------------------------------------------------------------------------|
| 1j | -9.8 | 0 | - | <p><b>Interactions</b></p> <ul style="list-style-type: none"> <li>van der Waals</li> <li>Pi-Pi Stacked</li> <li>Amide-Pi Stacked</li> <li>Pi-Alkyl</li> </ul>    |
| 1k | -9.8 | 0 | - | <p><b>Interactions</b></p> <ul style="list-style-type: none"> <li>Pi-Sigma</li> <li>Pi-Sulfur</li> <li>Pi-Pi Stacked</li> <li>Alkyl</li> <li>Pi-Alkyl</li> </ul> |
| 1l | -8.9 | 0 | - | <p><b>Interactions</b></p> <ul style="list-style-type: none"> <li>Pi-Sulfur</li> <li>Pi-Pi Stacked</li> <li>Pi-Alkyl</li> </ul>                                  |

|    |      |   |   |                                                                                                                                                                                                                                                                                                                         |
|----|------|---|---|-------------------------------------------------------------------------------------------------------------------------------------------------------------------------------------------------------------------------------------------------------------------------------------------------------------------------|
| 1m | -9.8 | 0 | - | 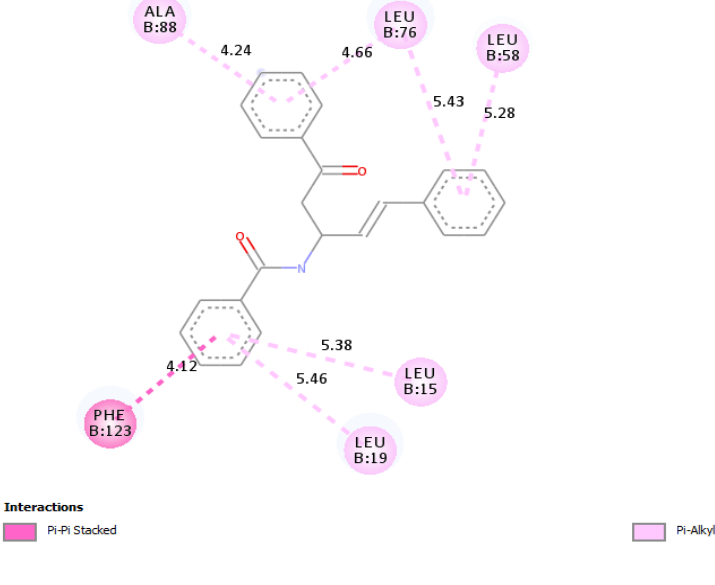 <p><b>Interactions</b></p> <ul style="list-style-type: none"> <li>Pi-Pi Stacked</li> <li>Pi-Alkyl</li> </ul>                                                                                                                         |
| 1n | -8.8 | 0 | - |  <p><b>Interactions</b></p> <ul style="list-style-type: none"> <li>Pi-Sulfur</li> <li>Pi-Pi Stacked</li> <li>Pi-Alkyl</li> </ul>                                                                                                     |
| 1o | -9.5 | 0 | - |  <p><b>Interactions</b></p> <ul style="list-style-type: none"> <li>van der Waals</li> <li>Pi-Cation</li> <li>Pi-Donor Hydrogen Bond</li> <li>Pi-Sigma</li> <li>Pi-Pi Stacked</li> <li>Amide-Pi Stacked</li> <li>Pi-Alkyl</li> </ul> |



|          |      |   |              |                                                                                                                                                                                                                                                                                                                         |
|----------|------|---|--------------|-------------------------------------------------------------------------------------------------------------------------------------------------------------------------------------------------------------------------------------------------------------------------------------------------------------------------|
| 1p       | -9.2 | 0 | -            | <p><b>Interactions</b></p> <ul style="list-style-type: none"> <li>Orange square: Pi-Cation</li> <li>Green square: Pi-Donor Hydrogen Bond</li> <li>Pink square: Pi-Pi T-shaped</li> <li>Light pink square: Pi-Alkyl</li> </ul>                                                                                           |
| 1q       | -8.3 | 0 | -            | <p><b>Interactions</b></p> <ul style="list-style-type: none"> <li>Yellow square: Pi-Sulfur</li> <li>Pink square: Pi-Pi Stacked</li> <li>Light pink square: Pi-Alkyl</li> </ul>                                                                                                                                          |
| Temephos | -7.6 | 3 | Ser79, Ala88 | <p><b>Interactions</b></p> <ul style="list-style-type: none"> <li>Green square: Conventional Hydrogen Bond</li> <li>Light green square: Pi-Donor Hydrogen Bond</li> <li>Purple square: Pi-Sigma</li> <li>Pink square: Pi-Pi Stacked</li> <li>Light pink square: Alkyl</li> <li>Light purple square: Pi-Alkyl</li> </ul> |

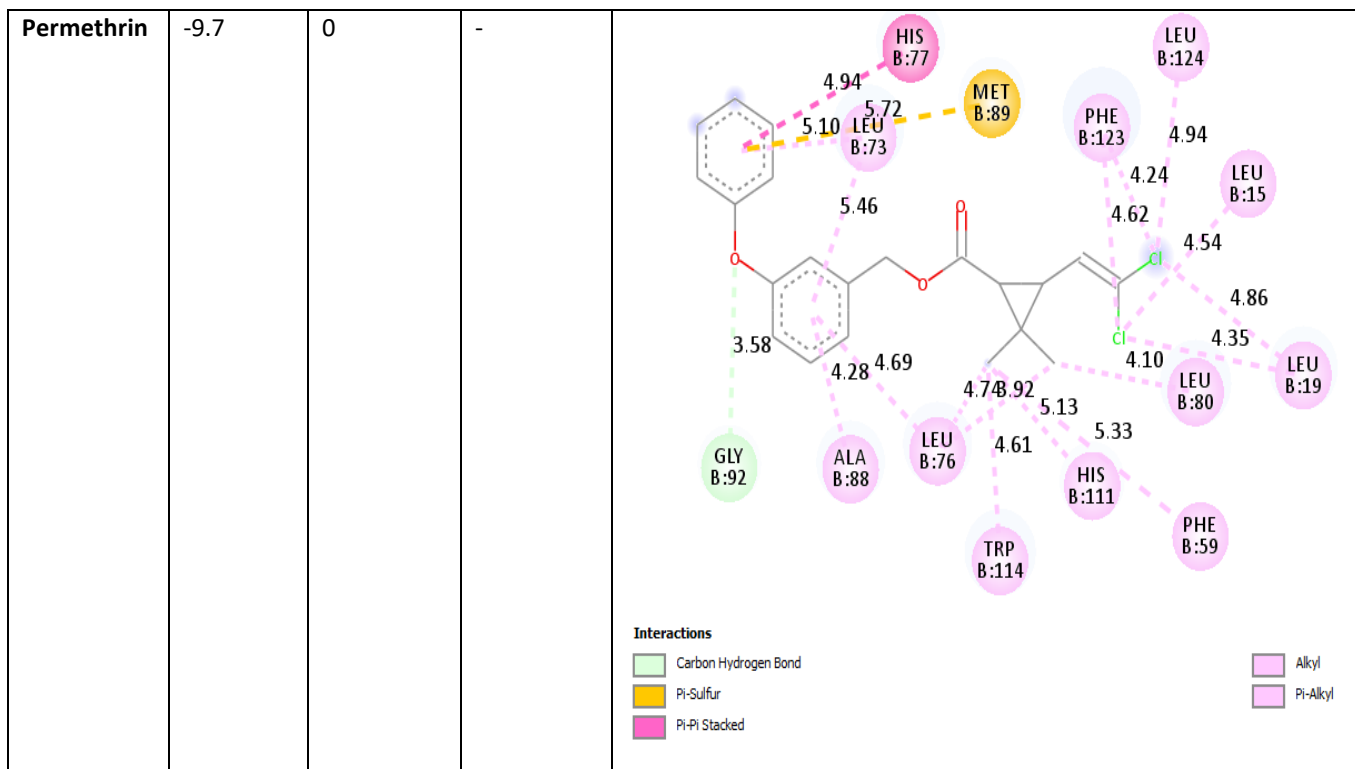

Supplement: 41598_2021_98281_MOESM1_ESM.pdf [file 41598_2021_98281_MOESM1_ESM.pdf]
